# Supplementary material for: Gullies and Moraines Are Islands of Biodiversity in an Arid, Mountain Landscape, Asgard Range, Antarctica
Source: Front Microbiol. 2021 Jun 10;12:654135. doi: 10.3389/fmicb.2021.654135 (PMC8222675; doi:10.3389/fmicb.2021.654135)
Supplement: Supplementary file 1 [file Table_1.xlsx]

## Sheet: Sheet1
SampleID	Habitat	Elevation (masl)	Aspect	Snowbank	percent_H2O	Biocrust	DNA_ng.ul	Tard_Live	Tard_Dead	Tard_total	Rotif_Live	Ritif_Dead	Rotif_total	Nema_Live	Nema_dead	Nema_total	Microfauna comments
ES1	Slope	287	east	no	0.332226	na	1.69	na	na	na	na	na	na	na	na	na	na
ES2	Slope	281	east	no	1.62338	na	0.108	na	na	na	na	na	na	na	na	na	na
ES3	Slope	273	east	no	0	na	0.255	na	na	na	na	na	na	na	na	na	na
ES4	Slope	266	east	no	0.660066	na	0.503	na	na	na	na	na	na	na	na	na	na
ES5	Slope	261	south-east	no	1.3245	na	0.462	na	na	na	na	na	na	na	na	na	na
ES6	Slope	258	south	no	0	na	0.103	na	na	na	na	na	na	na	na	na	na
ES7	Slope	256	south	no	0.321543	na	0.365	na	na	na	na	na	na	na	na	na	na
ES8	Slope	256	south	no	0.326797	na	0.169	na	na	na	na	na	na	na	na	na	na
NG1	NearGully	441.046	east	no	2.58745	na	3.06	0	0	0	1	0	1	39	0	39	Scottnema (4F/11M/24J)
NG2	NearGully	437.388	east	no	0.517288	na	1.75	0	0	0	1	0	1	9	0	9	Scottnema (4F/1M/4J)
NG3	NearGully	419.1	east	no	0.211367	na	1.84	0	0	0	1	0	1	7	0	7	Scottnema (2F/1M/4J)
NG4	NearGully	388.62	east	no	0.217391	na	1.88	0	0	0	1	0	1	33	1	34	Scottnema (4F/9M/21J)
NG5	NearGully	376.733	east	no	0.254669	na	2.13	0	0	0	0	0	0	17	0	17	Scottnema (4F/14J)
NG6	NearGully	369.113	east	no	0.0459453	na	2.24	0	0	0	0	0	0	28	0	28	Scottnema (1F/5M/22J)
NG7	NearGully	338.328	east	no	0	na	1.84	0	0	0	0	0	0	30	3	33	Scottnema (5F/3M/21J), Plectus (1J)
NG8	NearGully	327.66	east	no	0.235793	na	1.92	0	0	0	0	0	0	8	0	8	Scottnema (1F/1M/6J)
NG9	NearGully	320.04	east	no	0.0525486	na	1.37	0	0	0	0	0	0	10	0	10	Scottnema (2F/8J)
GB1	Gully	437.388	east	yes	6.46104	black	15.8	4	5	9	0	0	0	5	0	5	Scottnema (all J)
GB2	Gully	419.1	east	yes	na	black	244	na	na	na	na	na	na	na	na	na	na
GB3	Gully	388.62	east	yes	8.08511	black	8.44	1	3	4	1	0	1	2	0	2	Scottnema (1F) Eudorylaimus (1J)
GB4	Gully	338.328	east	yes	na	black	na	na	na	na	na	na	na	na	na	na	na
GB5	Gully	327.66	east	yes	na	black	244	na	na	na	na	na	na	na	na	na	na
GB6	Gully	320.04	east	yes	na	black	280	na	na	na	na	na	na	na	na	na	na
GB7	Gully	419.1	east	yes	na	black	na	na	na	na	na	na	na	na	na	na	na
GB8	Gully	369.113	east	yes	4.82444	black	8.64	3	2	5	1	0	1	2	0	2	Scottnema (1J), Plectus (1J)
GB9	Gully	369.113	east	yes	na	black	na	na	na	na	na	na	na	na	na	na	na
GF1	Gully	441.046	east	yes	1.09597	green	26	17	20	37	1	0	1	0	0	0
GF2	Gully	320.04	east	yes	na	green	na	na	na	na	na	na	na	na	na	na	na
GF3	Gully	320.04	east	yes	na	green	above 400	na	na	na	na	na	na	na	na	na	na
GG1	Gully	441.046	east	yes	10.9609	green	232	na	na	na	na	na	na	na	na	na	na
GG2	Gully	419.1	east	yes	na	green	122	na	na	na	na	na	na	na	na	na	na
GG3	Gully	376.733	east	yes	na	green	364	na	na	na	na	na	na	na	na	na	na
GG4	Gully	369.113	east	yes	na	green	3.69	1	2	3	1	0	1	13	1	14	Scottnema (1F/2J), Eudorylaimus (1M/1J), Plectus (7F/1J)
GG5	Gully	369.113	east	yes	na	green	na	na	na	na	na	na	na	na	na	na	na
GG6	Gully	338.328	east	yes	na	green	na	na	na	na	na	na	na	na	na	na	na
GG7	Gully	338.328	east	yes	na	green	na	na	na	na	na	na	na	na	na	na	na
GG8	Gully	327.66	east	yes	na	green	above 400	na	na	na	na	na	na	na	na	na	na
GG9	Gully	320.04	east	yes	na	green	76	na	na	na	na	na	na	na	na	na	na
MO1	Moraine	457	south	yes	15.9947	green	4.04	19	0	19	3	0	3	167	0	167	Scottnema (14F/5M/26J), Plectus (5F/117J)
MO2	Moraine	445	south	yes	4.18006	na	0.928	3	0	3	1	0	1	0	0	0
MO3	Moraine	432	south	yes	7.63094	na	6.68	34	0	34	0	0	0	3	0	3	Scottnema (1F/2J)
MO4	Moraine	426	south	yes	9.85915	green	5.4	na	na	na	na	na	na	na	na	na	na
MO5	Moraine	419	south	yes	9.66702	black/green	14.2	3	0	3	2	0	2	19	0	19	Scottnema (3F/6J), Eudorylaimus (2F/2J), Plectus (2F/4J)
MO6	Moraine	413	south	yes	14.4669	na	12.3	62	0	62	3	0	3	6	0	6	Plectus (J)
MO7	Moraine	407	south	yes	12.6458	black	12.2	na	na	na	na	na	na	na	na	na	na
